# Supplementary material for: Beyond support: exploring the dynamic and static biomechanical changes induced by preventive ankle taping: a novel cross-sectional study
Source: PeerJ. 2025 Jan 27;13:e18472. doi: 10.7717/peerj.18472 (PMC11781261; doi:10.7717/peerj.18472)
Supplement: Supplemental Information 2 [file peerj-13-18472-s002.xlsx]

## Sheet: Hoja1
ID	SEX(0M,1W)	AGE	WEIGHT	HEIGHT	SHOE SIZE	DOMINANCY (0L,1R)	SEBT ANTERIOR	SEBT LEFT	SEBT RIGHT	POST.SEBT ANTERIOR	POST.SEBT IZQ	POST.SEBT DCHA	P.Máx a/cm2 r	P.Máx a/cm2 m	P.Máx a/cm2 a	surface cm2 r	surface cm2 m	surface cm2 a	surface cm2 r	surface cm2 m	surface cm2 a	P.mean g/cm2 r	P.mean g/cm2 m	P.mean g/cm2 a	P.máx g/cm2 r	P.máx g/cm2 m	P.máx g/cm2 a	speed ms r	speed ms m	speed ms a	post.P.Máx a/cm2 r	post.P.Máx a/cm2 m	post.P.Máx a/cm2 a	post.surface cm2 r	post.surface cm2 m	post.surface cm2 a	post.surface cm2 r	post.surface cm2 m	post.surface cm2 a	post.P.mean g/cm2 r	post.P.mean g/cm2 m	post.P.mean g/cm2 a	post.P.máx g/cm2 r	post.P.máx g/cm2 m	post.P.máx g/cm2 a	post.speed ms r	post.speed ms m	post.speed ms a
1	1	21	59	1.65	39.5	1	103	76	80	97	70	70	913	297	476	29	17	33	35	21	54	841	671	1226	2157	1006	3374	530	570	710	862	395	470	37	26	30	37	39	54	2589	1638	1907	2969	2201	2829	510	510	560
2	1	21	52	1.72	39.5	1	123	92	80	97	86	76	815	414	537	33	23	21	29	32	36	909	1219	1340	2078	2878	3580	370	550	600	744	368	473	28	31	33	32	39	36	690	926	1112	2339	2585	3682	350	550	610
3	1	22	64	1.67	40.5	1	73	77	76	70	74	74	900	462	522	33	48	25	30	53	37	1129	1601	1472	1861	2101	2187	630	800	730	872	515	407	30	44	30	30	38	35	666	991	1375	2868	2594	4380	480	610	600
4	1	22	54	1.6	40	1	82	84	76	83	100	84	705	392	443	32	45	17	39	45	31	805	1099	1130	1964	2926	3316	350	560	580	685	392	333	28	42	23	33	54	38	537	747	897	1438	2238	2957	330	550	540
5	1	18	67	1.75	39	1	73	73	73	70	76	70	785	448	571	32	39	29	32	52	34	868	867	1293	2535	2382	3894	480	610	610	846	518	475	34	41	26	30	57	28	1109	1506	1534	2114	2452	2868	500	620	600
6	1	21	67	1.72	39	1	76	63	63	70	78	70	666	697	706	31	42	28	33	49	35	1712	1800	1880	2650	3056	3448	440	590	560	782	810	734	25	38	24	34	48	32	1298	1380	1228	3246	3727	4380	440	570	550
7	1	18	58	1.67	37.5	1	85	128	117	82	126	101	865	702	824	26	33	26	25	38	36	953	1071	1256	2640	2456	3599	380	530	560	781	656	705	24	32	19	25	41	27	882	1500	1428	2412	3241	3706	350	520	520
8	1	20	60	1.65	38.5	1	77	121	120	68	111	106	807	536	581	26	31	27	27	45	27	920	1182	1200	2241	2961	2961	360	530	490	823	696	608	26	34	21	27	46	30	1296	1422	1380	2599	3001	3111	390	570	510
9	0	19	72	1.8	43	0	97	107	120	92	98	104	768	622	615	25	49	25	33	62	27	1679	1834	2016	2908	3120	3183	410	610	520	669	600	563	30	50	30	30	17	11	1585	689	1146	3439	1322	2684	320	440	510
10	0	20	100	1.95	48.5	1	78	66	76	79	93	76	916	607	786	41	56	39	36	72	38	1530	1942	2063	3066	4295	3588	460	590	590	906	668	792	37	56	33	33	80	38	958	1402	1174	2742	3623	3040	410	590	560
11	0	20	78	1.8	44.5	1	83	83	77	82	86	78	609	458	590	43	57	40	36	67	46	797	1166	1152	1759	2913	2708	390	600	590	717	475	543	42	58	32	37	71	49	1012	1366	1424	1557	2537	2630	270	580	560
12	0	22	85	1.74	42	1	79	91	85	79	91	73	539	547	688	32	70	28	33	79	44	851	1416	1428	2431	3374	3757	470	700	700	651	452	570	30	57	33	31	81	46	769	1272	1227	2286	3385	3786	420	660	640
13	0	21	71.5	1.86	44	1	79	76	69	77	72	72	740	550	436	31	61	24	35	73	37	845	1517	1389	1659	2858	2152	290	590	570	688	485	335	33	60	26	34	63	40	770	1201	1014	2374	2739	2223	430	590	570
14	0	19	63.5	1.78	44	1	78	78	66	82	62	65	728	528	534	31	46	31	32	51	38	463	862	780	1246	2914	1691	330	590	620	750	562	441	33	54	33	30	50	46	855	1280	1267	2120	2801	2516	500	640	620
15	0	19	63.5	1.78	44	1	86	70	72	73	70	68	572	577	512	29	56	34	28	66	35	580	939	911	2044	2632	1848	490	660	650	615	448	476	24	42	30	33	64	38	766	979	954	2409	2603	1817	520	660	600
16	1	21	55	1.63	36	1	77	62	70	71	76	60	693	391	526	24	33	23	28	46	40	996	1085	1141	2076	2487	3078	270	560	560	665	500	506	23	38	24	25	47	35	750	1350	1440	1665	2417	2739	290	530	510
17	1	21	60	1.69	39	1	84	74	70	82	64	75	639	481	522	31	50	32	27	62	36	828	897	979	2457	2083	3664	530	670	640	724	397	427	34	43	30	33	57	39	998	1055	1132	2784	2434	4056	400	540	490
18	0	23	87	1.81	42	1	87	81	81	85	80	85	613	640	698	33	59	40	35	59	47	1102	1472	1511	2329	2636	2897	460	620	630	657	603	590	32	58	39	32	71	45	1147	1447	1431	2240	2527	2418	440	600	570
19	0	19	64	1.67	41	1	76	64	64	78	74	67	698	482	578	29	46	31	30	59	34	883	1291	1281	2082	2565	3160	520	660	640	681	554	495	25	51	28	29	67	36	1203	1779	1674	1993	2411	2479	500	680	620
20	1	19	50	1.7	38	1	104	65	78	99	70	72	857	609	493	23	24	17	20	45	36	700	1246	1192	1326	2131	2593	330	620	620	805	583	522	20	26	20	23	46	36	777	1002	997	2026	2345	2471	380	610	610
21	0	27	86	1.84	42.5	0	90	90	100	87	80	100	552	635	574	32	52	46	37	58	39	1042	872	1239	2581	2644	3210	370	550	520	624	758	582	31	51	38	32	59	43	1066	1381	1256	2618	2835	3688	320	550	510
22	1	25	63	1.7	38.5	0	73	70	76	70	61	60	1034	600	702	32	24	22	30	30	36	1091	1067	1169	2956	2623	3395	430	550	570	968	675	675	32	23	23	26	34	38	1030	1114	1245	2273	2082	3257	310	550	580
23	0	22	79	1.76	42	1	87	84	80	77	87	81	789	415	495	33	43	34	35	47	47	894	1145	1542	2186	2324	3204	430	600	680	737	529	523	30	39	35	33	50	43	965	1573	1807	1794	2040	2514	450	600	650
24	0	21	70	1.85	43	1	84	74	70	75	56	55	689	593	625	31	45	27	35	41	32	1177	743	1581	3194	1993	3480	410	560	590	664	525	563	27	38	33	30	61	34	597	1156	985	1556	3075	2629	300	700	660
25	1	21	59	1.56	38.5	0	83	64	78	88	68	78	698	331	499	28	42	35	23	52	51	671	704	1092	1723	1653	4438	260	540	610	656	458	458	22	40	35	23	63	45	801	1070	1075	1951	2546	3797	310	590	580
26	0	21	83	1.81	44	1	82	66	78	74	68	62	789	786	756	32	46	35	39	40	46	1932	1617	2621	2908	3005	4976	470	540	590	896	777	633	35	43	34	31	55	40	1133	1739	2050	3175	3934	4400	460	570	590
27	0	21	85	1.85	45	1	96	85	85	96	77	73	845	703	625	42	41	31	41	59	55	819	937	978	1879	2855	3112	350	630	640	949	704	655	38	37	38	37	59	52	1848	2418	2904	1993	2680	2921	310	600	620
28	0	21	75	1.78	43	1	91	79	66	81	78	70	781	508	518	43	48	30	40	61	43	757	908	1088	1986	1876	3107	430	570	600	793	544	476	38	42	27	38	56	41	789	989	1021	1754	2814	2306	610	710	670
29	1	17	57	1.56	36.5	1	69	58	54	77	70	66	567	347	543	26	30	34	28	52	44	689	743	1049	1091	1678	3682	250	630	700	644	386	376	20	30	27	22	57	41	573	835	870	1576	1905	2999	440	730	740
30	1	19	65	1.69	39	1	91	72	88	77	84	76	828	474	344	42	33	29													690	446	333	38	46	23
31	1	20	62	1.63	38	1	75	75	75	68	78	65	639	473	611	26	45	37	29	55	46	554	545	726	1617	1545	2626	420	680	690	711	491	457	27	44	32	30	59	45	506	753	876	1510	1555	2916	480	630	640
32	0	29	74	1.77	44	1	92	94	86	90	91	86	684	536	608	35	42	44													657	464	521	38	41	41
33	1	20	70	1.71	40	1	95	80	75	85	72	70	856	409	490	38	36	33	31	58	48	968	1229	1207	2118	2118	2536	440	600	640	803	493	445	31	36	35	28	64	44	884	885	1062	2491	2242	2887	480	590	560
34	0	23	69	1.82	44.5	0	87	88	88	80	80	90	645	422	491	33	41	39	35	50	54	866	987	1020	2343	2648	3535	460	600	690	588	533	560	32	44	42	32	54	48	1233	1092	1255	2517	2909	3566	480	670	680
35	0	23	75	1.79	44	1	82	70	77	82	78	71	627	537	563	35	48	37	37	57	47	811	1191	1301	1946	2726	3062	430	590	610	536	528	605	30	42	41	32	61	48	698	1179	1215	1630	2125	2430	430	570	570
36	1	24	63	1.67	38	1	72	77	77	72	78	80	667	570	575	25	45	29	35	44	34	968	1564	1543	2439	2619	2704	460	620	650	745	602	550	30	39	30	24	47	40	695	990	1081	1808	2680	2365	400	610	590
37	0	22	91	1.87	45	1	83	80	93	88	81	90	964	764	355	34	45	31	38	71	55	1042	1321	1356	2405	2216	2376	580	710	730	893	634	487	40	43	36	38	69	50	987	1518	1687	2365	2185	2555	470	690	700
38	0	18	112	1.93	46	1	77	79	53	97	70	50	1003	869	803	45	54	36	43	67	59	780	1140	1142	2431	2817	3280	560	780	870	929	802	674	38	62	38	40	73	54	1119	1624	1768	2905	3200	3760	600	870	89
39	0	18	92	1.96	47.5	1	97	63	80	97	79	82	768	575	591	34	46	59	35	58	64	821	1210	1143	2248	2015	2691	390	630	700	768	718	683	32	50	39	39	51	65	841	1108	1158	2442	2064	2471	410	650	690
40	0	22	67	1.84	45	1	78	79	83	83	83	83	655	551	565	37	39	30	34	46	48	815	859	1145	2471	1799	2904	490	550	640	754	508	538	28	33	38	31	57	42	938	1214	1221	2424	2386	3219	400	570	590
41	0	18	76	1.85	44	1	90	95	84	85	85	81	725	404	543	45	37	46	40	63	58	821	937	936	2391	1774	2419	550	670	730	847	655	452	34	37	36	38	61	50	814	1011	992	2134	2496	2320	580	730	780
42	0	21	77	1.78	43	1	91	87	90	83	81	85	856	768	519	37	36	36	33	59	38	770	804	929	2491	2836	1980	550	670	670	812	822	648	35	37	35	31	55	39	982	1096	1151	3176	2130	2616	560	630	620
43	0	23	81	1.83	44	1	81	94	95	77	80	83	802	477	427	36	58	33	34	70	45	561	1052	1101	1607	2123	2628	380	790	850	826	509	509	35	41	42	32	74	42	863	1474	1166	1754	2196	3043	450	760	800
44	0	23	91	1.9	45	0	88	78	85	80	85	72	651	489	623	42	50	49	43	61	60	698	621	932	2105	1561	2520	550	620	720	886	421	570	51	49	44	26	61	57	692	1019	949	1695	2370	2528	540	700	750
45	0	25	80	1.73	43	1	94	85	80	85	87	81	649	520	722	33	44	55	33	81	46	664	898	916	1784	2165	2486	590	870	730	667	575	425	29	60	30	33	67	50	989	1157	1099	2420	2420	2334	650	850	710
46	0	21	72	1.86	43.5	0	78	84	87	81	83	87	897	686	728	32	31	38	28	39	54	711	1106	1112	1412	2813	1919	440	640	690	930	514	642	31	22	39	29	48	43	918	1175	1010	2165	2937	2015	580	710	740
47	1	22	57	1.63	38	1	80	89	87	76	81	81	567	347	543	26	30	34	28	52	44	650	743	1049	1091	1678	3682	250	630	700	644	386	376	20	30	27	22	49	49	604	824	870	1576	1847	2999	440	700	740
48	0	23	72	1.7	40	1	70	52	54	66	49	58	522	416	530	28	56	36													629	567	612	22	47	41
49	1	21	59	1.69	40	1	78	64	65	79	90	85	722	532	483	25	33	38													729	534	428	20	38	27
50	1	24	58	1.65	39	0	95	88	91	89	70	75	987	498	668	27	14	41													1053	694	619	26	17	20
51
52
53
54
55
56
57
58
59
60
61
62
63
64
65
66
67
68
69
70
71
72
73
74
75
76
77
78
79
80
81
82
83
84
85
86
87
88
89
90
91
92
93
94
95
96
97
98
99
100
